# Supplementary material for: Exploring the interaction sites in glucose and galactose using phenol as a probe
Source: Royal Society of Chemistry journal article supplement (doi:10.1039/d2cp06036a), 2023-01-01

## Exploring the interaction sites in glucose and galactose using phenol as a probe

### *ELECTRONIC SUPPLEMENTARY INFORMATION*

Paúl Pinillos‡, Ander Camiruaga‡, Fernando Torres-Hernández, Francisco J. Basterrechea,  
Imanol Usabiaga\* and José A. Fernández\*

<sup>a</sup> Department of Physical Chemistry, Fac. of Science and Technology, University of the Basque Country (UPV/EHU), B<sup>o</sup> Sarriena s/n, 48940 Spain.

‡ These authors contributed equally to this work.

\*Correspondence: i.usabiaga@outlook.es, [josea.fernandez@ehu.es](mailto:josea.fernandez@ehu.es)

**Figure S1.** Comparison between the experimental IDIR spectrum of  $\beta$ -PhGlc-PhOH complex and the computational simulations for the five most stable structures at M062x/6-311++G(d,p) level.

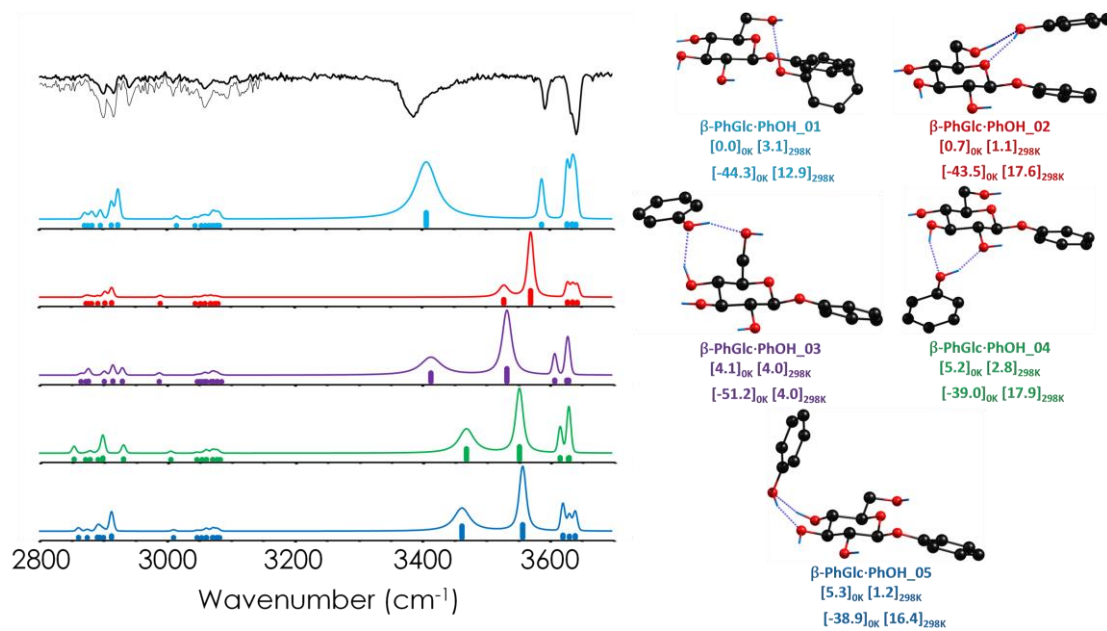

**Figure S2.** Comparison between the experimental IDIR spectrum of  $\beta$ -PhGlc-PhOH complex and the computational simulations for the five most stable structures at B3LYP(D3)/6-311++G(d,p) level.

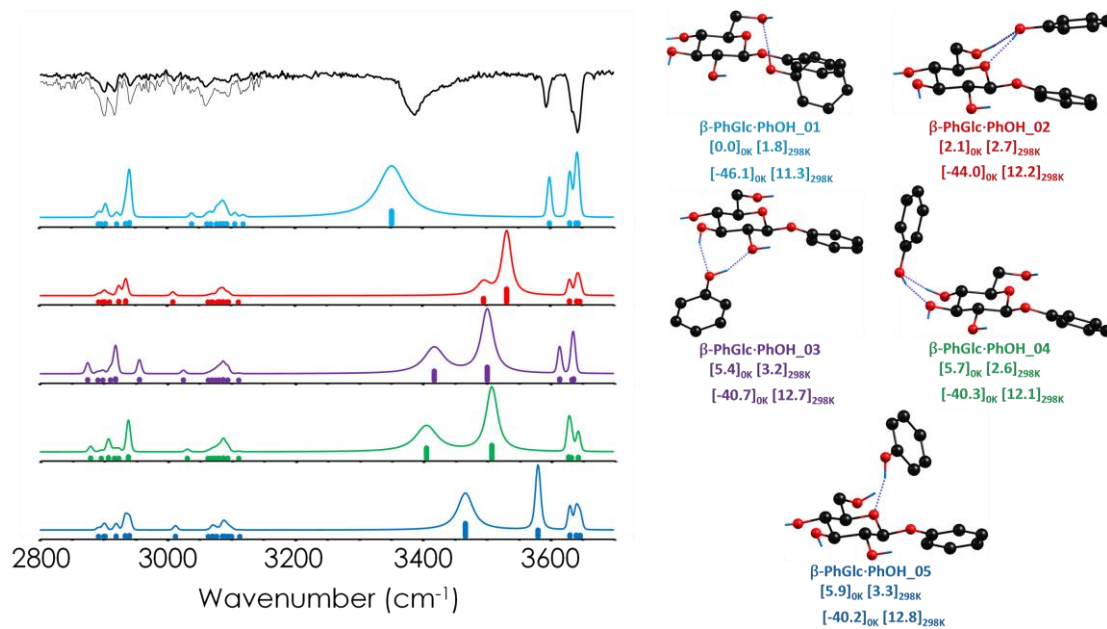

**Figure S3.** Comparison between the experimental IDIR spectrum for  $\beta$ -PhGal·PhOH complex and the computational simulations for the five most stable structures at M062X/6-311++G(d,p) level.

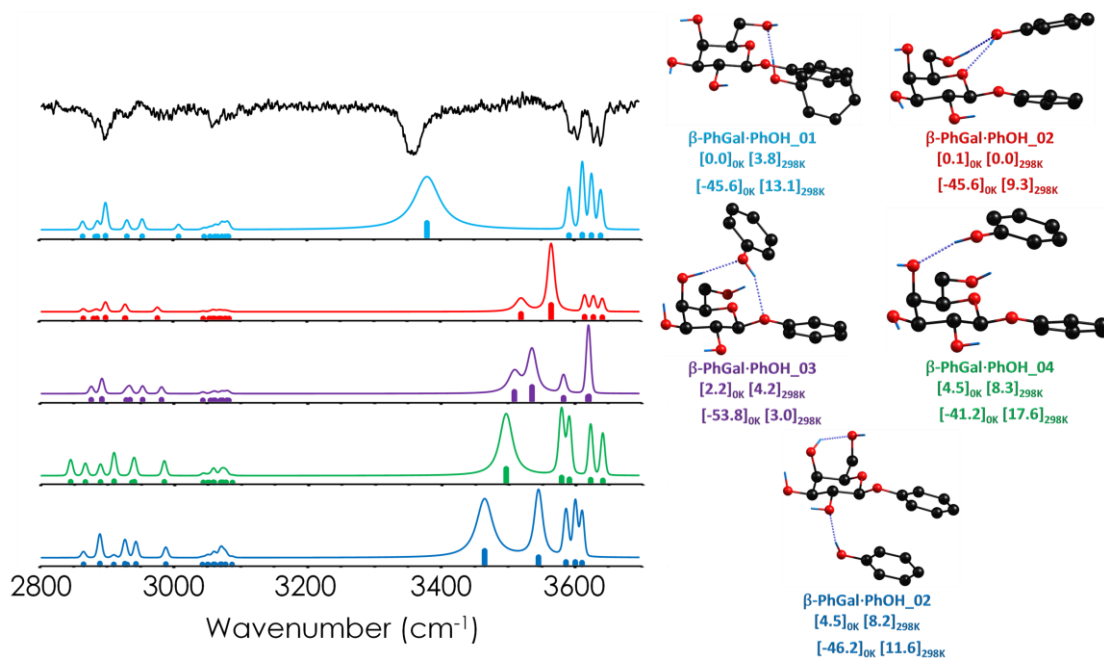

**Figure S4.** Comparison between the experimental IDIR spectrum for  $\beta$ -PhGal-PhOH complex and the computational simulations for the five most stable structures at B3LYP(D3)/6-311++G(d,p) level.

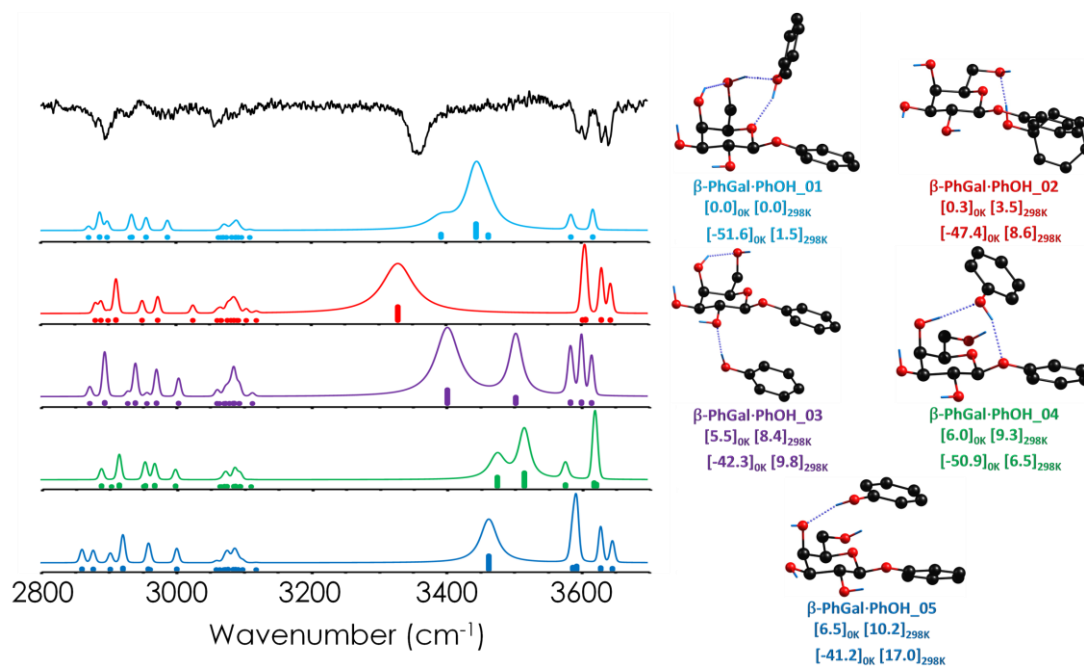

**Figure S5.** Comparison between the experimental IDIR spectrum for  $\beta$ -MeGlc·PhOH complex and the computational simulations for the five most stable structures at M062X/6-311++G(d,p) level.

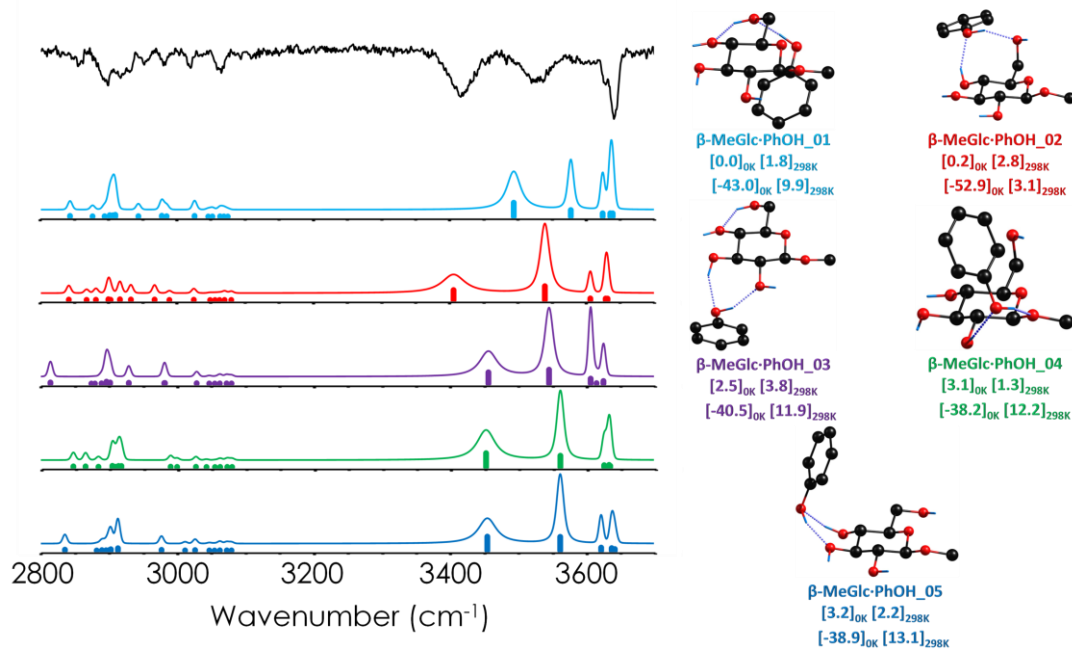

**Figure S6.** Comparison between the experimental IDIR spectrum for  $\beta$ -MeGlc-PhOH complex and the computational simulations for the five most stable structures at B3LYP(D3)/6-311++G(d,p) level.

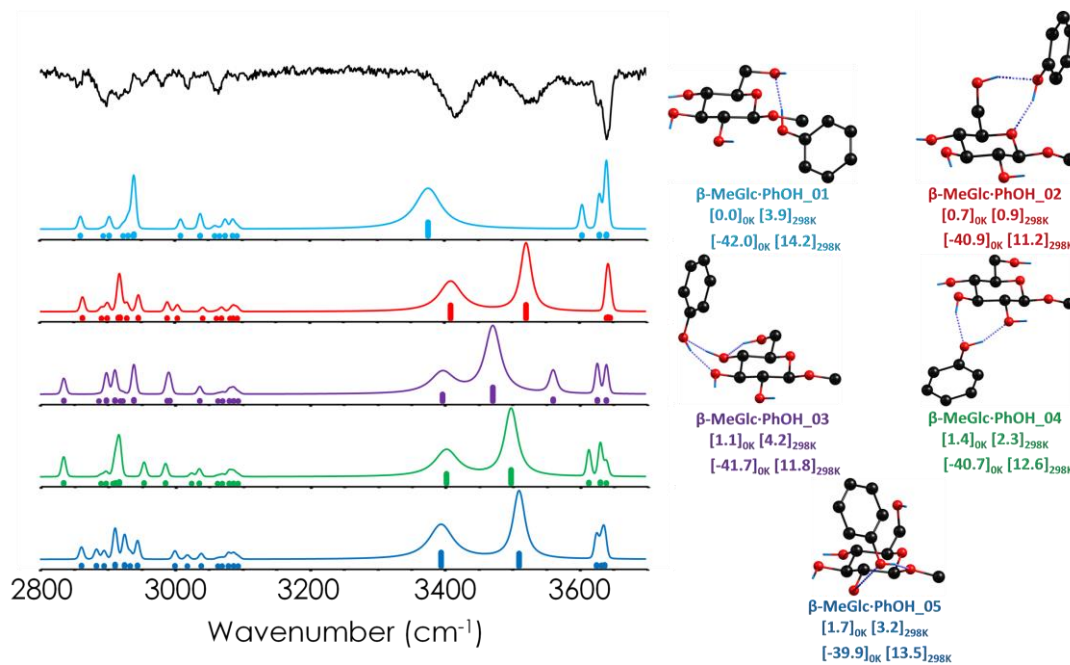

**Figure S7.** Comparison between the experimental IDIR spectrum for  $\beta$ -MeGal-PhOH complex and the computational simulations for the five most stable structures at M062X/6-311++G(d,p) level.

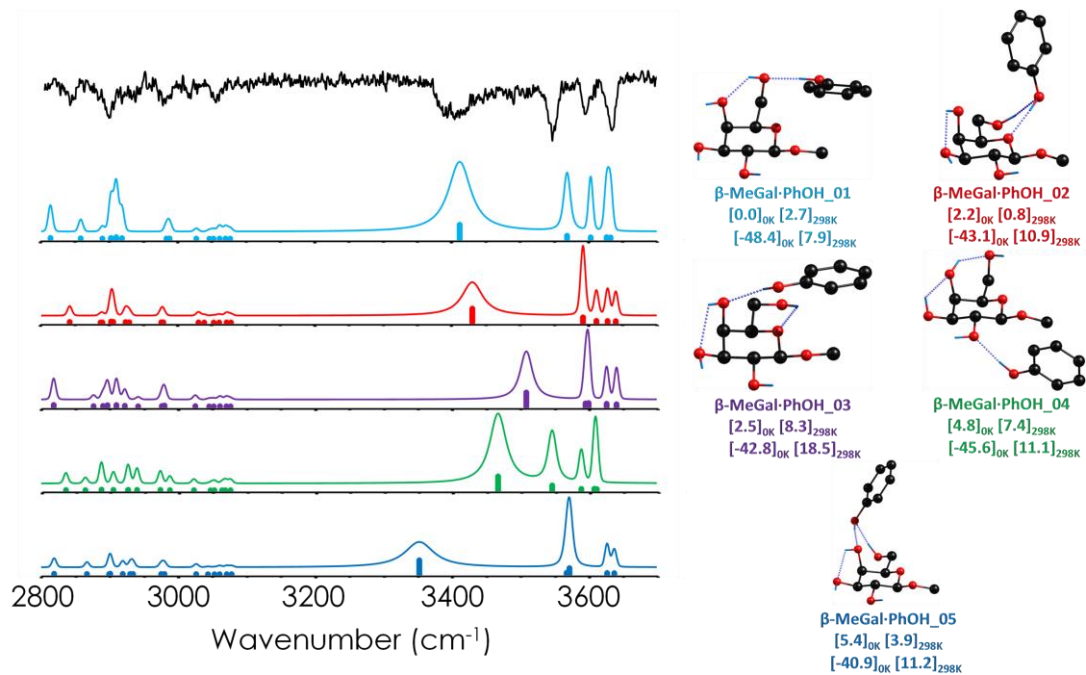



**Figure S8.** Comparison between the experimental IDIR spectrum for  $\beta$ -MeGal-PhOH complex and the computational simulations for the five most stable structures at B3LYP(D3)/6-311++G(d,p) level.

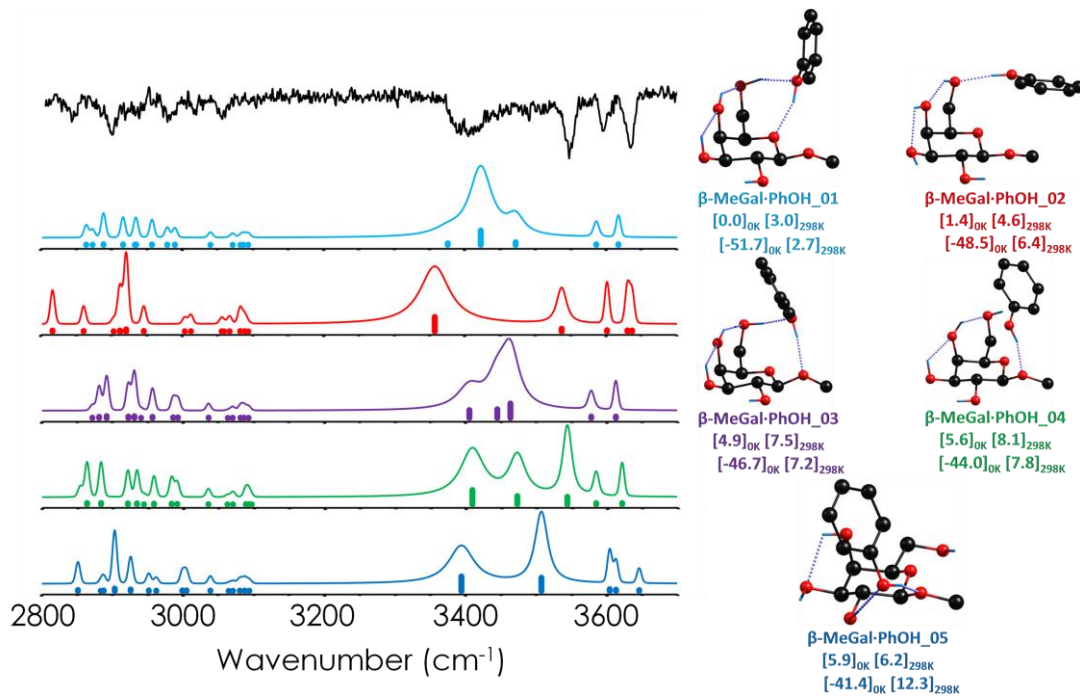

**Figure S9.** Comparison between the experimental IDIR spectrum for  $\alpha$ -MeGlc-PhOH complex and the computational simulations for the five most stable structures at M062X/6-311++G(d,p) level.

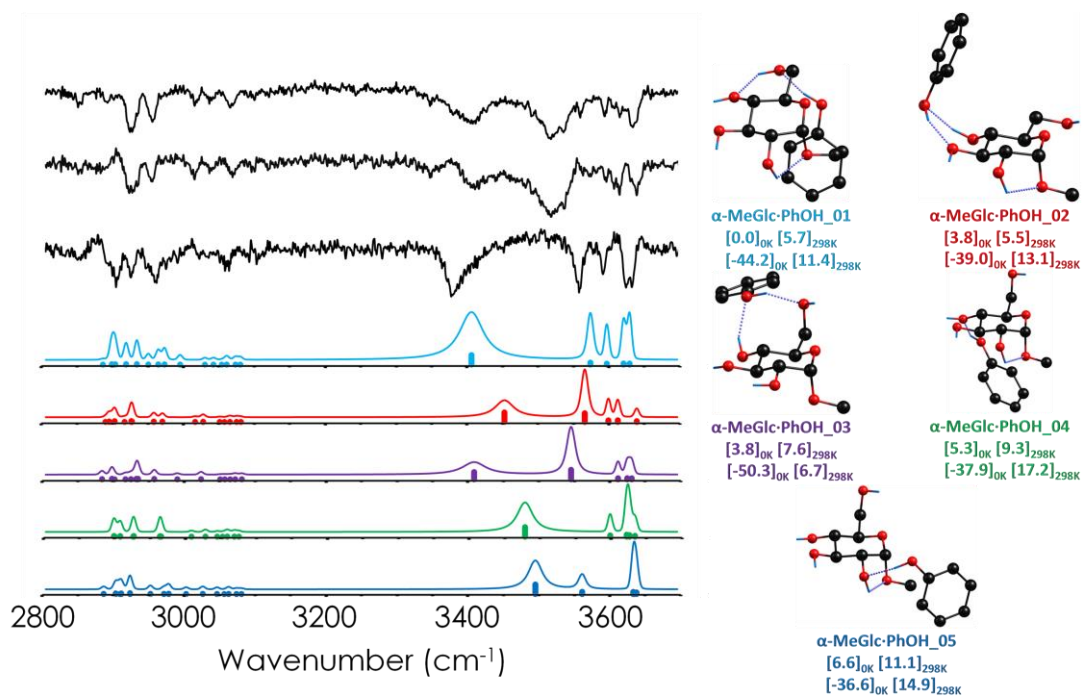

**Figure S10.** Comparison between the experimental IDIR spectrum for  $\alpha$ -MeGlc-PhOH complex and the computational simulations for the five most stable structures at B3LYP(D3)/6-311++G(d,p) level.

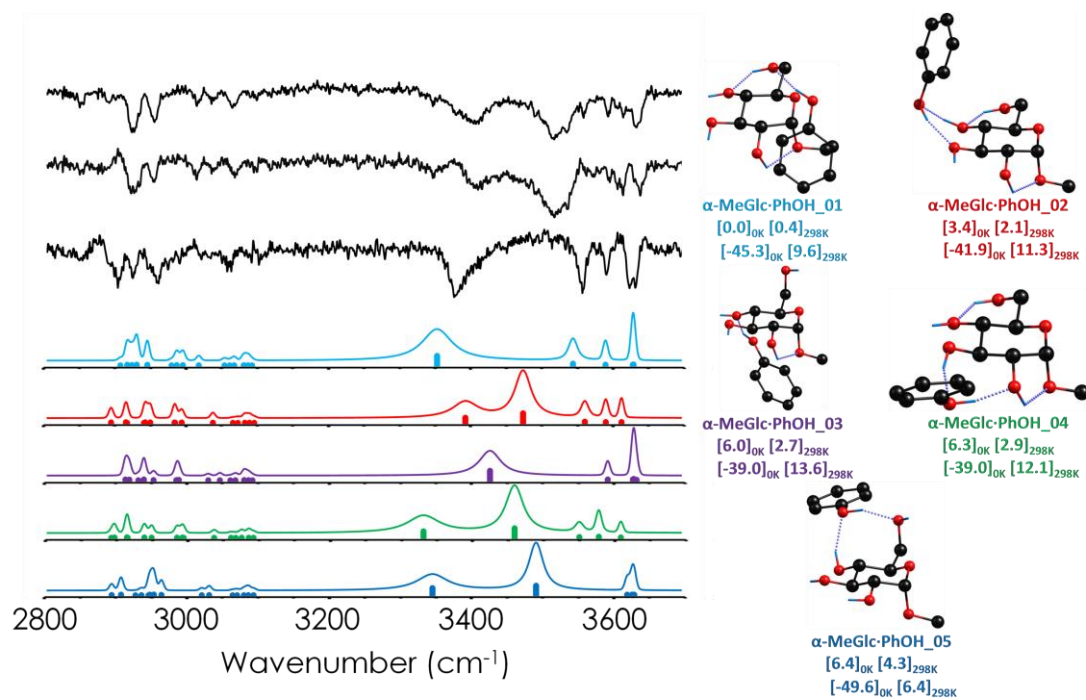

**Figure S11.** Comparison between the experimental IDIR spectrum for  $\alpha$ -MeGal-PhOH complex and the computational simulations for the five most stable structures at M062X/6-311++G(d,p) level.

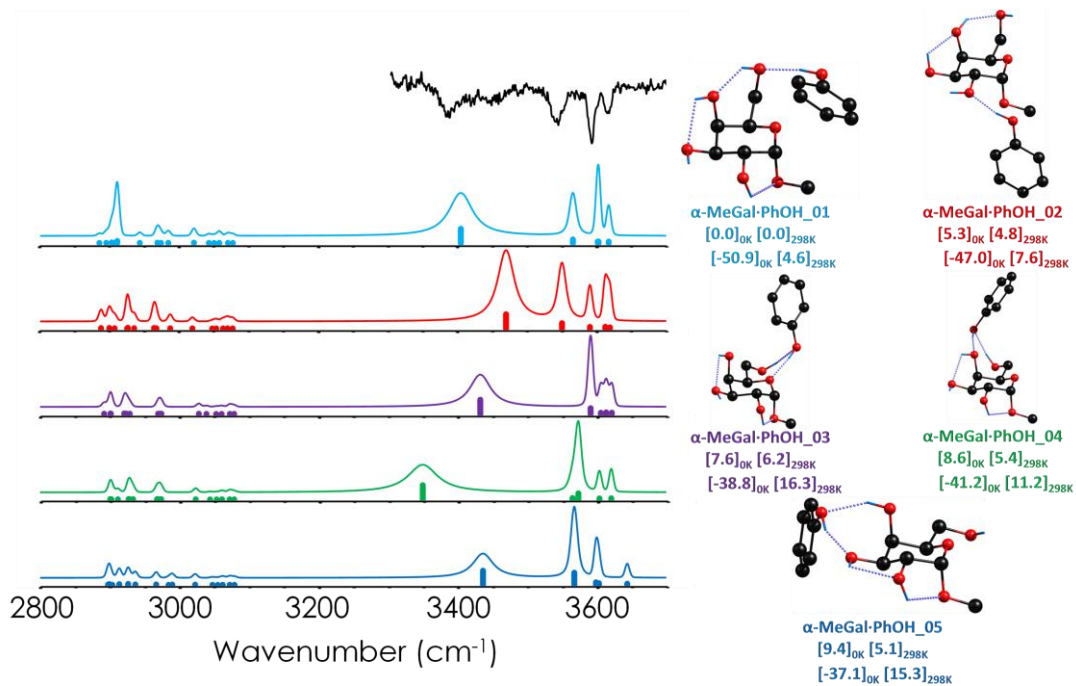

**Figure S12.** Comparison between the experimental IDIR spectrum for  $\alpha$ -MeGal-PhOH complex and the computational simulations for the five most stable structures at B3LYP(D3)/6-311++G(d,p) level.

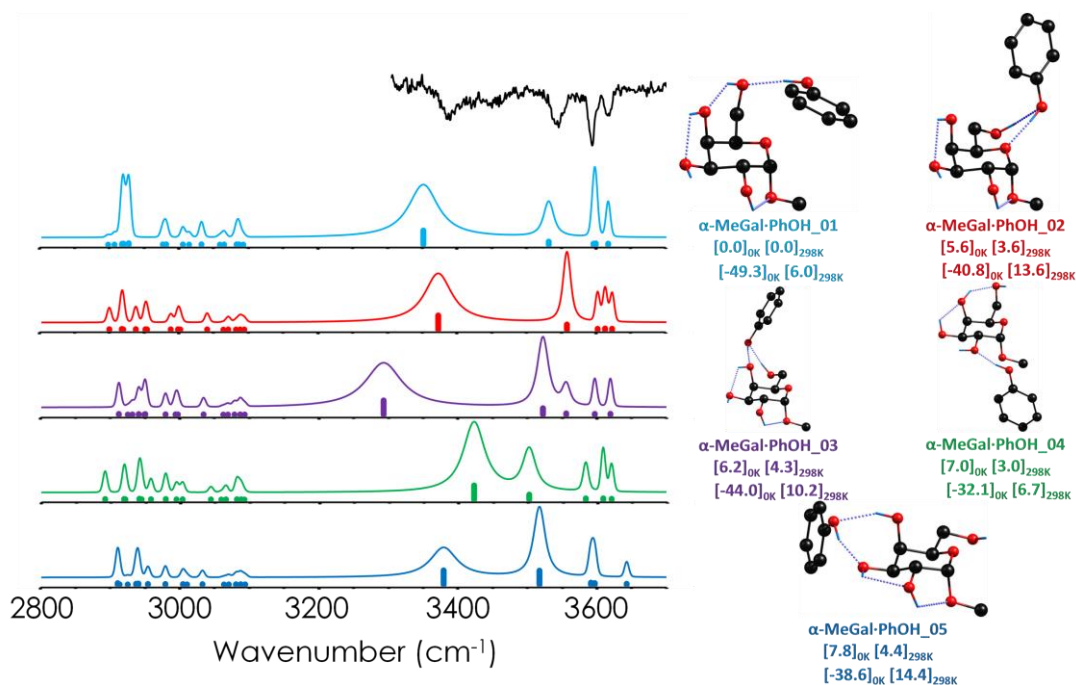

**Table S1.** Relative Gibbs energies for the most stable conformers of each family of  $\beta$ -PhGlc-PhOH complex. Values include ZPE and BSSE corrections.

| LABEL                  | FAMILY              | M062X                       |                               | B3LYP                       |                               | RMSD<br>(NO H ATOMS) |
|------------------------|---------------------|-----------------------------|-------------------------------|-----------------------------|-------------------------------|----------------------|
|                        |                     | $\Delta G$ (0K)<br>(kJ/mol) | $\Delta G$ (298K)<br>(kJ/mol) | $\Delta G$ (0K)<br>(kJ/mol) | $\Delta G$ (298K)<br>(kJ/mol) |                      |
| $\beta$ -PhGlc-PhOH_01 | HO6-HOPh_1          | 0.0                         | 3.1                           | 0.0                         | 1.8                           | 0.08                 |
| $\beta$ -PhGlc-PhOH_02 | O5-HOPh_O6H-OHPh_1  | 0.7                         | 1.1                           | 2.1                         | 2.7                           | 0.13                 |
| $\beta$ -PhGlc-PhOH_03 | O4H-OHPh_HO6-HOPh_1 | 4.1                         | 4.0                           | 6.0                         | 4.8                           | 0.19                 |
| $\beta$ -PhGlc-PhOH_04 | HO2-HOPh_O3H-OHPh_1 | 5.2                         | 2.8                           | 5.4                         | 3.2                           | 0.17                 |
| $\beta$ -PhGlc-PhOH_05 | HO3-HOPh_O4H-OHPh_1 | 5.3                         | 1.2                           | 5.7                         | 2.6                           | 0.24                 |
| $\beta$ -PhGlc-PhOH_06 | O6H-OHPh_1          | 5.8                         | 1.9                           | 6.0                         | 0.2                           | 0.27                 |
| $\beta$ -PhGlc-PhOH_07 | O1-HOPh_1           | 6.0                         | 4.9                           | 7.8                         | 4.6                           | 0.23                 |
| $\beta$ -PhGlc-PhOH_08 | O2H-OHPh_1          | 6.2                         | 6.7                           | 9.9                         | 7.9                           | 0.16                 |
| $\beta$ -PhGlc-PhOH_09 | HO2-HOPh_1          | 6.3                         | 8.0                           | 7.4                         | 5.2                           | 0.37                 |
| $\beta$ -PhGlc-PhOH_10 | HO6-HOPh_1          | 0.0                         | 3.1                           | 0.0                         | 1.8                           | 0.08                 |

**Figure S13.** Most stable conformers of  $\beta$ -PhGlc-PhOH complex computed at B3LYP(D3)/6-311++G(d,p) and M062X/6-311++G(d,p) level. Energies inside brackets are given in kJ/mol.

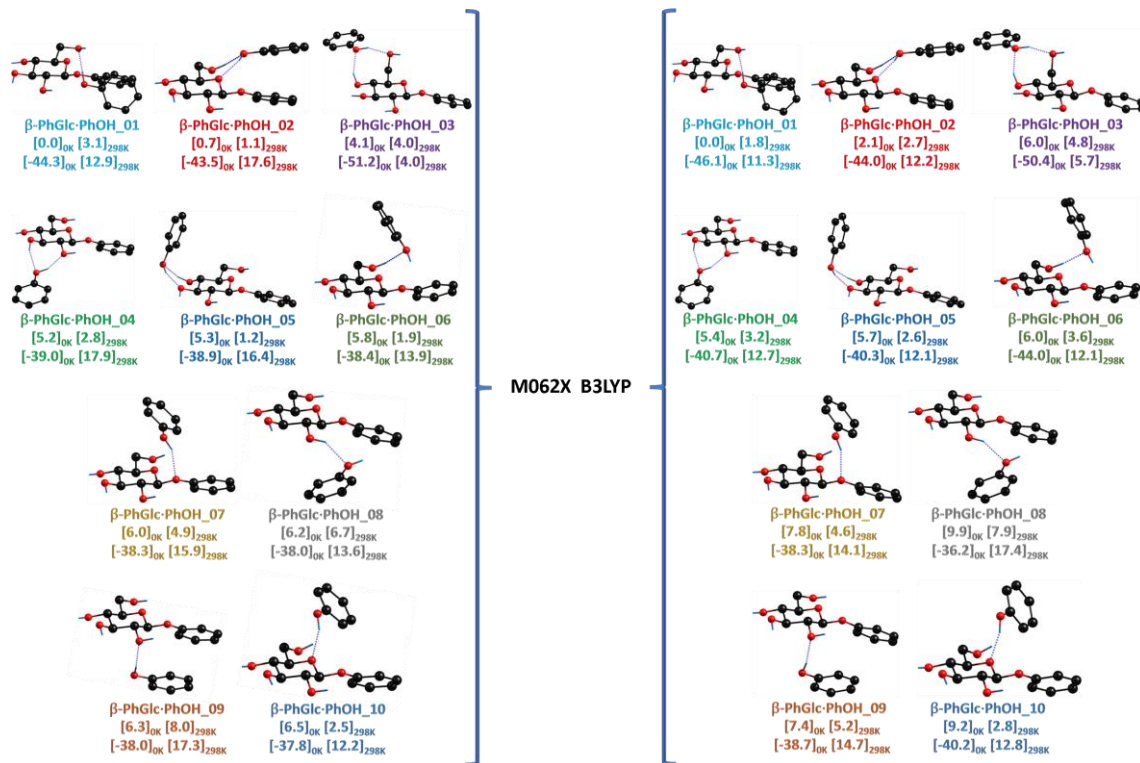

**Figure S14.** Comparison between the experimental IDIR spectrum for  $\beta$ -PhGlc-PhOH complex and the computational simulations for the ten most stable structures at B3LYP(D3)/6-311++G(d,p) and M062X/6-311++G(d,p) level.

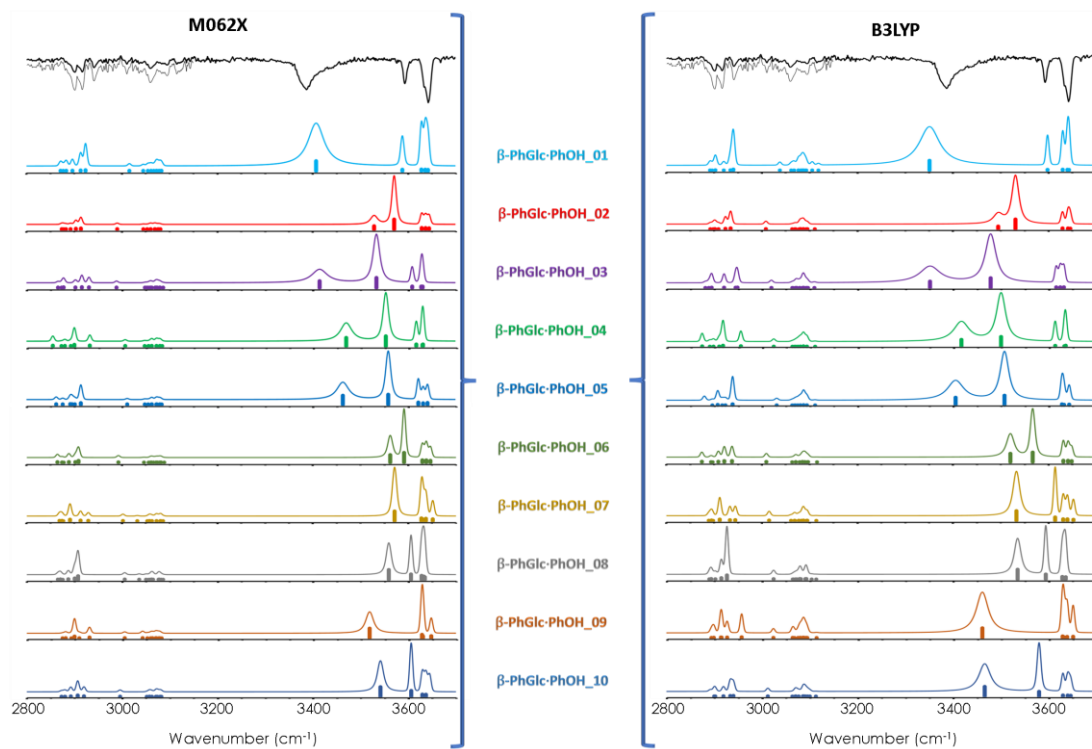

**Table S2.** Relative Gibbs energies for the most stable conformers of each family of  $\beta$ -PhGal·PhOH complex. Values include ZPE and BSSE corrections.

| LABEL                   | FAMILY             | M062X                       |                                  | B3LYP                       |                                  | RMSD<br>(NO H ATOMS) |
|-------------------------|--------------------|-----------------------------|----------------------------------|-----------------------------|----------------------------------|----------------------|
|                         |                    | $\Delta G$ (0K)<br>(kJ/mol) | $\Delta G$<br>(298K)<br>(kJ/mol) | $\Delta G$ (0K)<br>(kJ/mol) | $\Delta G$<br>(298K)<br>(kJ/mol) |                      |
| $\beta$ -PhGal·PhOH_01  | HO6·HOPh_1         | 0.0                         | 3.8                              | 0.3                         | 3.5                              | 0.07                 |
| $\beta$ - PhGal·PhOH_02 | O5·HOPh_O6H·OHPh_1 | 0.1                         | 0.0                              | 1.7                         | 2.9                              | 0.13                 |
| $\beta$ - PhGal·PhOH_03 | O4H·OPhH'O1_01     | 2.2                         | 4.2                              | 6.0                         | 9.3                              | 0.13                 |
| $\beta$ - PhGal·PhOH_04 | OPhH'O4_01         | 4.5                         | 8.3                              | 6.5                         | 10.2                             | 0.09                 |
| $\beta$ - PhGal·PhOH_05 | OPhH'O2_01         | 4.5                         | 8.2                              | 5.5                         | 8.4                              | 0.10                 |
| $\beta$ - PhGal·PhOH_06 | O6H·OHPh_1         | 5.2                         | 6.0                              | 8.3                         | 11.1                             | 0.16                 |
| $\beta$ - PhGal·PhOH_07 | O3H·OPhH'O2_01     | 6.3                         | 3.3                              | 7.4                         | 5.3                              | 0.18                 |
| $\beta$ - PhGal·PhOH_08 | O2H·OHPh           | 7.4                         | 7.9                              | 11.7                        | 10.9                             | 0.17                 |
| $\beta$ - PhGal·PhOH_09 | O6H·OPhH'O1        | 8.6                         | 9.0                              | 7.4                         | 5.2                              | 1.07***              |
| $\beta$ - PhGal·PhOH_10 | OPhH'O1_01         | 9.2                         | 8.3                              | 10.1                        | 8.5                              | 0.19                 |



**Figure S15.** Most stable conformers of  $\beta$ -PhGal-PhOH complex computed at B3LYP(D3)/6-311++G(d,p) and M062X/6-311++G(d,p) level. Energies inside brackets are given in kJ/mol.

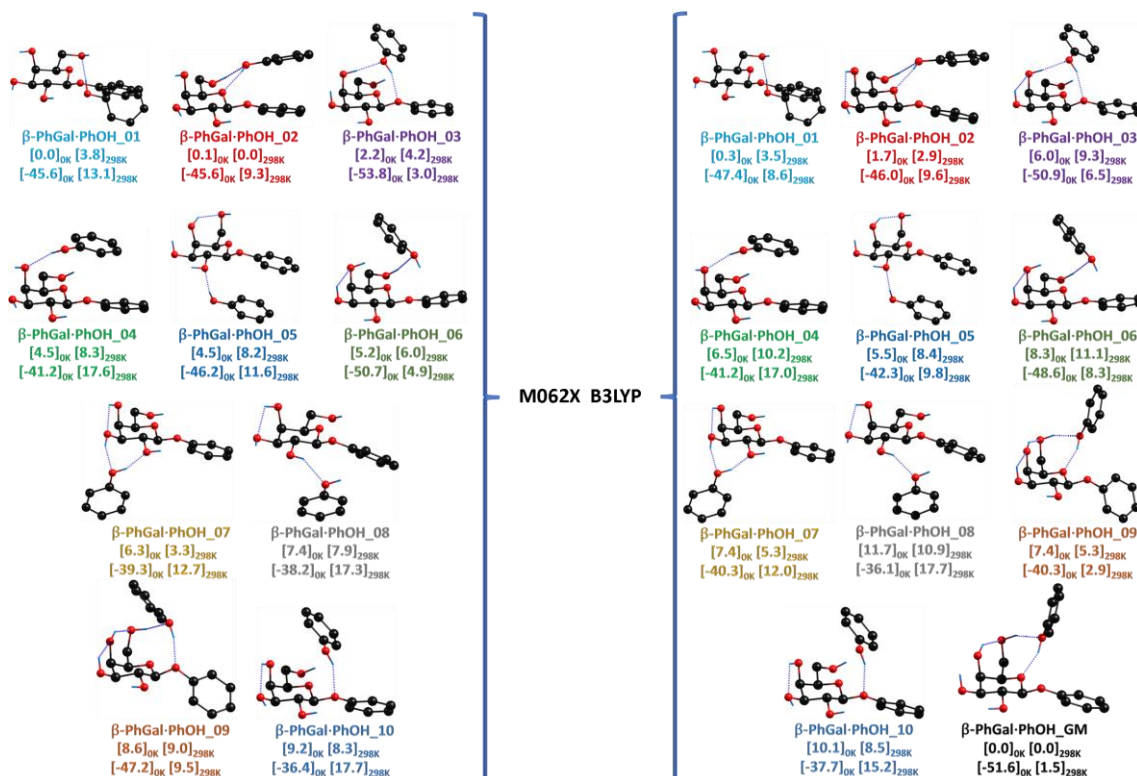

**Figure S16.** Comparison between the experimental IDIR spectrum for  $\beta$ -PhGal-PhOH complex and the computational simulations for the ten most stable structures at B3LYP(D3)/6-311++G(d,p) and M062X/6-311++G(d,p) level.

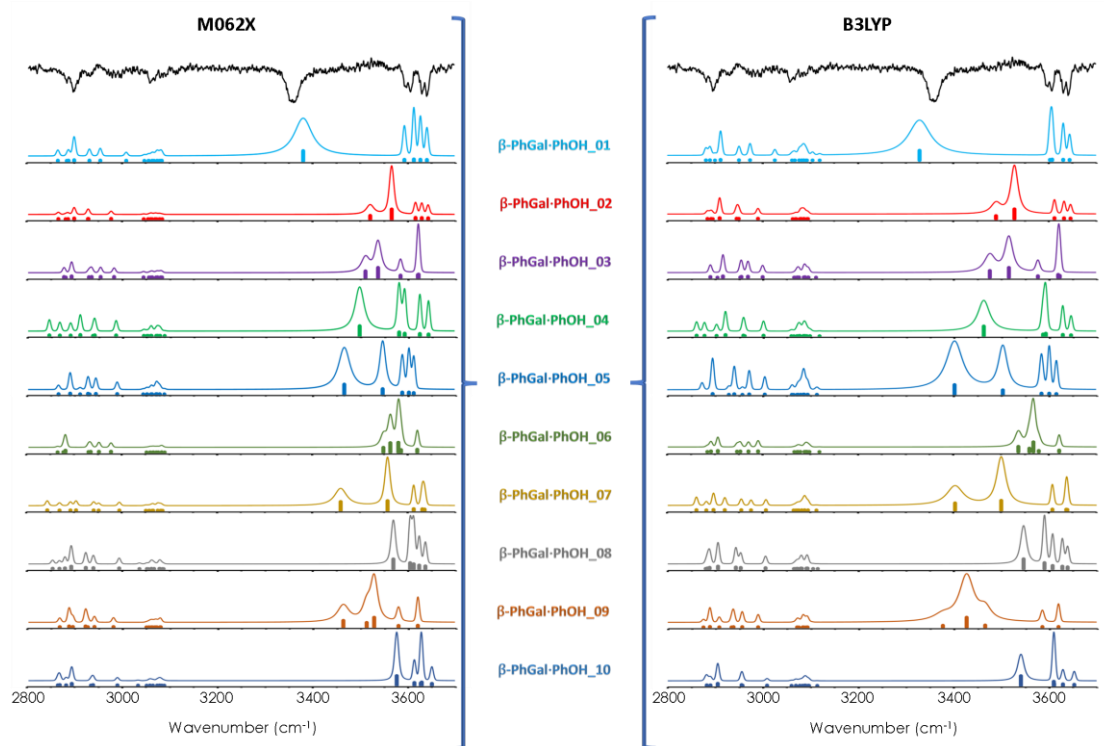

**Table S3.** Relative Gibbs energies for the most stable conformers of each family of  $\beta$ -MeGlc·PhOH complex. Values include ZPE and BSSE corrections.

| LABEL                  | FAMILY            | M062X                       |                               | B3LYP                       |                               | RMSD<br>(NO H ATOMS) |
|------------------------|-------------------|-----------------------------|-------------------------------|-----------------------------|-------------------------------|----------------------|
|                        |                   | $\Delta G$ (0K)<br>(kJ/mol) | $\Delta G$ (298K)<br>(kJ/mol) | $\Delta G$ (0K)<br>(kJ/mol) | $\Delta G$ (298K)<br>(kJ/mol) |                      |
| $\beta$ -MeGlc·PhOH_01 | HO6·HOPh_1        | 0.0                         | 1.8                           | 2.4                         | 1.8                           | 0.28                 |
| $\beta$ -MeGlc·PhOH_02 | O4H·OHPH_HO6·HOPh | 0.2                         | 2.8                           | 2.2                         | 4.8                           | 0.16                 |
| $\beta$ -MeGlc·PhOH_03 | HO2·HOPh_O3H·OHPH | 2.5                         | 3.8                           | 1.5                         | 4.7                           | 0.19                 |
| $\beta$ -MeGlc·PhOH_04 | O1·HOPh_O2H·OHPH  | 3.1                         | 1.3                           | 1.7                         | 3.2                           | 0.14                 |
| $\beta$ -MeGlc·PhOH_05 | HO3·HOPh_O4H·OHPH | 3.2                         | 2.2                           | 1.6                         | 2.0                           | 0.21                 |
| $\beta$ -MeGlc·PhOH_06 | O5·HOPh_O6H·OHPH  | 4.2                         | 4.6                           | 1.9                         | 0.0                           | 0.42                 |
| $\beta$ -MeGlc·PhOH_07 | O1·HOPh           | 4.6                         | 6.5                           | 7.5                         | 8.1                           | 0.12                 |
| $\beta$ -MeGlc·PhOH_08 | HO2·HOPh          | 4.6                         | 5.2                           | 5.3                         | 6.6                           | 0.18                 |
| $\beta$ -MeGlc·PhOH_09 | HO4·HOPh          | 6.6                         | 5.5                           | 5.7                         | 3.6                           | 0.08                 |
| $\beta$ -MeGlc·PhOH_10 | HO3·HOPh          | 6.6                         | 7.6                           | 5.1                         | 5.6                           | 0.28                 |

**Figure S17.** Most stable conformers of  $\beta$ -MeGlc-PhOH complex computed at B3LYP(D3)/6-311++G(d,p) and M062X/6-311++G(d,p) level. Energies inside brackets are given in kJ/mol. The global minimum at B3LYP(D3)/6-311++G(d,p) level corresponds to an isomer with different relative orientations of the two molecules than the global minimum obtained using M062X/6-311++G(d,p)

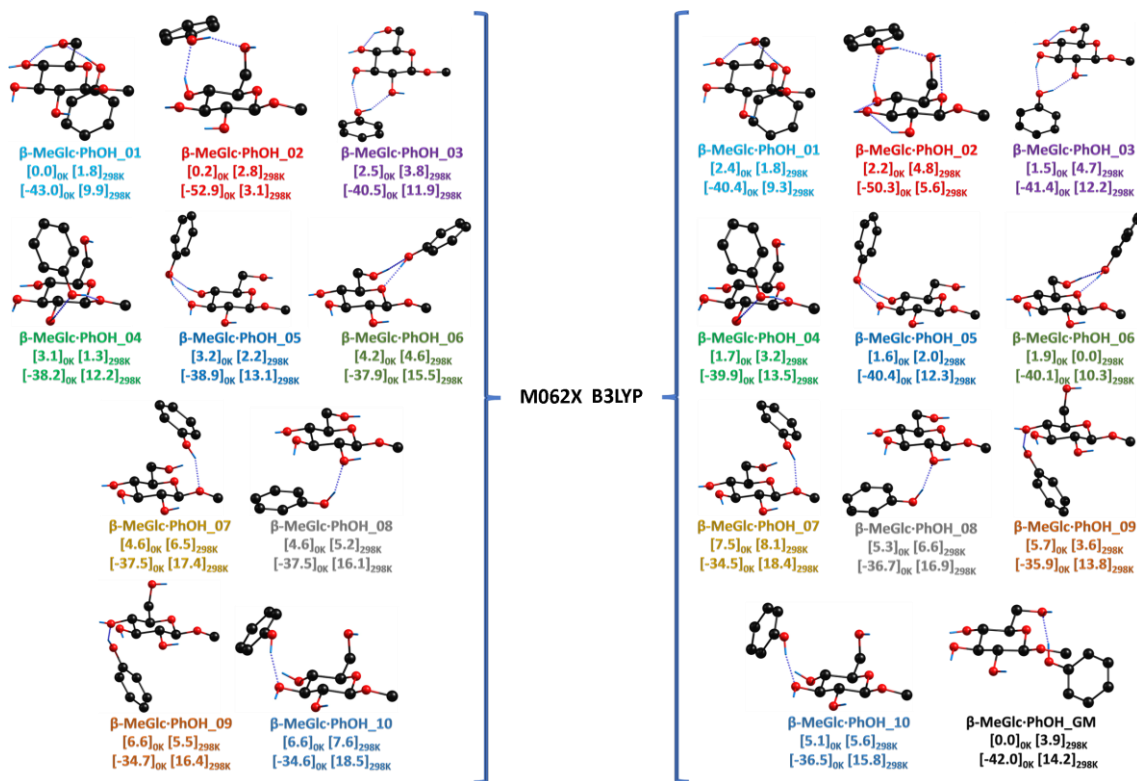

**Figure S18.** Comparison between the experimental IDIR spectrum for  $\beta$ -MeGlc-PhOH complex and the computational simulations for the ten most stable structures at B3LYP(D3)/6-311++G(d,p) and M062X/6-311++G(d,p) level.

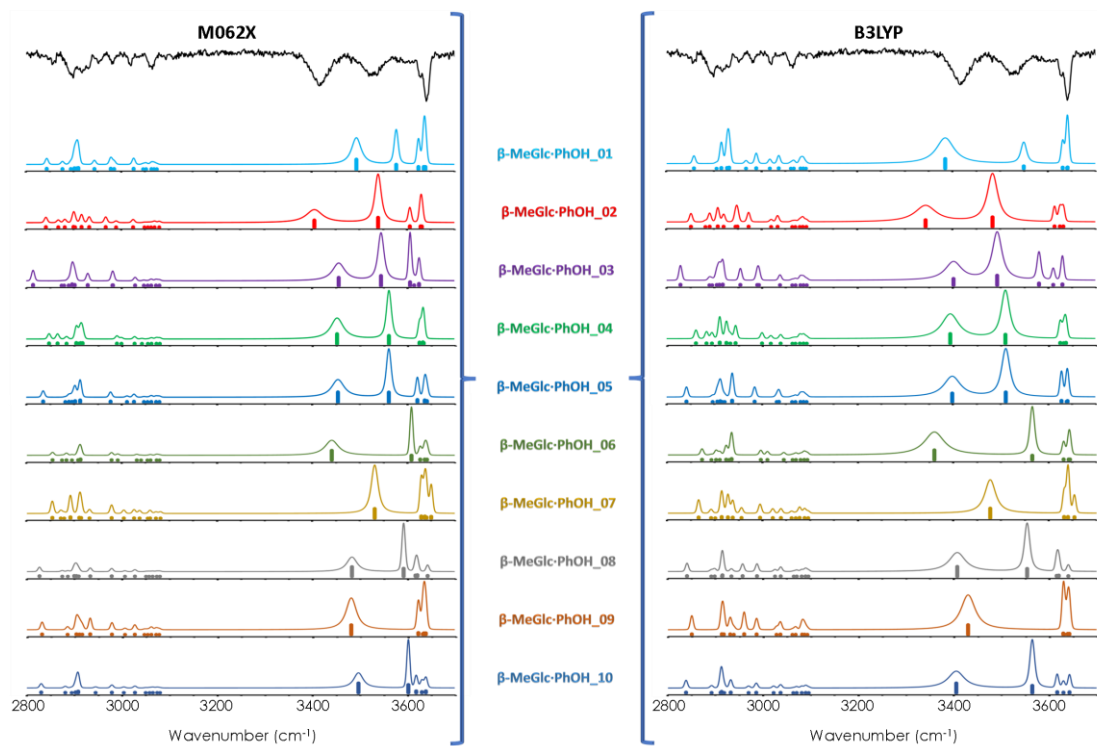

**Table S4.** Relative Gibbs energies for the most stable conformers of each family of  $\beta$ -MeGal·PhOH complex. Values include ZPE and BSSE corrections.

| LABEL                  | FAMILY            | M062X                       |                               | B3LYP                       |                               | RMSD<br>(NO H ATOMS) |
|------------------------|-------------------|-----------------------------|-------------------------------|-----------------------------|-------------------------------|----------------------|
|                        |                   | $\Delta G$ (0K)<br>(kJ/mol) | $\Delta G$ (298K)<br>(kJ/mol) | $\Delta G$ (0K)<br>(kJ/mol) | $\Delta G$ (298K)<br>(kJ/mol) |                      |
| $\beta$ -MeGal·PhOH_01 | HO6·HOPh          | 0.0                         | 2.7                           | 1.4                         | 4.6                           | 0.16                 |
| $\beta$ -MeGal·PhOH_02 | O5·HOPh_O6H·OHPH  | 2.2                         | 0.8                           | 3.5                         | 4.8                           | 0.06                 |
| $\beta$ -MeGal·PhOH_03 | HO4·HOPh          | 2.5                         | 8.3                           | 8.2                         | 11.4                          | 0.12                 |
| $\beta$ -MeGal·PhOH_04 | HO2·HOPh          | 4.8                         | 7.4                           | 8.1                         | 6.9                           | 0.29                 |
| $\beta$ -MeGal·PhOH_05 | HO4·HOPh_O6H·OHPH | 5.4                         | 3.9                           | 6.1                         | 7.9                           | 0.09                 |
| $\beta$ -MeGal·PhOH_06 | O1·HOPh           | 5.4                         | 6.2                           | 5.6                         | 8.1                           | 0.17                 |
| $\beta$ -MeGal·PhOH_07 | O1·HOPh_O6H·OHPH  | 5.4                         | 6.5                           | 4.9                         | 7.5                           | 0.24                 |
| $\beta$ -MeGal·PhOH_08 | HO2·HOPh_O3H·OHPH | 5.7                         | 1.8                           | 7.2                         | 6.1                           | 0.19                 |
| $\beta$ -MeGal·PhOH_09 | O1·HOPh_O4H·OHPH  | 5.9                         | 8.0                           | 11.5                        | 15.4                          | 0.13                 |
| $\beta$ -MeGal·PhOH_10 | HO6·HOPh          | 0.0                         | 2.7                           | 1.4                         | 4.6                           | 0.16                 |

**Figure S19.** Most stable conformers of  $\beta$ -MeGal-PhOH complex computed at B3LYP(D3)/6-311++G(d,p) and M062X/6-311++G(d,p) level. Energies inside brackets are given in kJ/mol. The global minimum at B3LYP(D3)/6-311++G(d,p) level corresponds to an isomer with different relative orientations of the two molecules than the global minimum obtained using M062X/6-311++G(d,p)

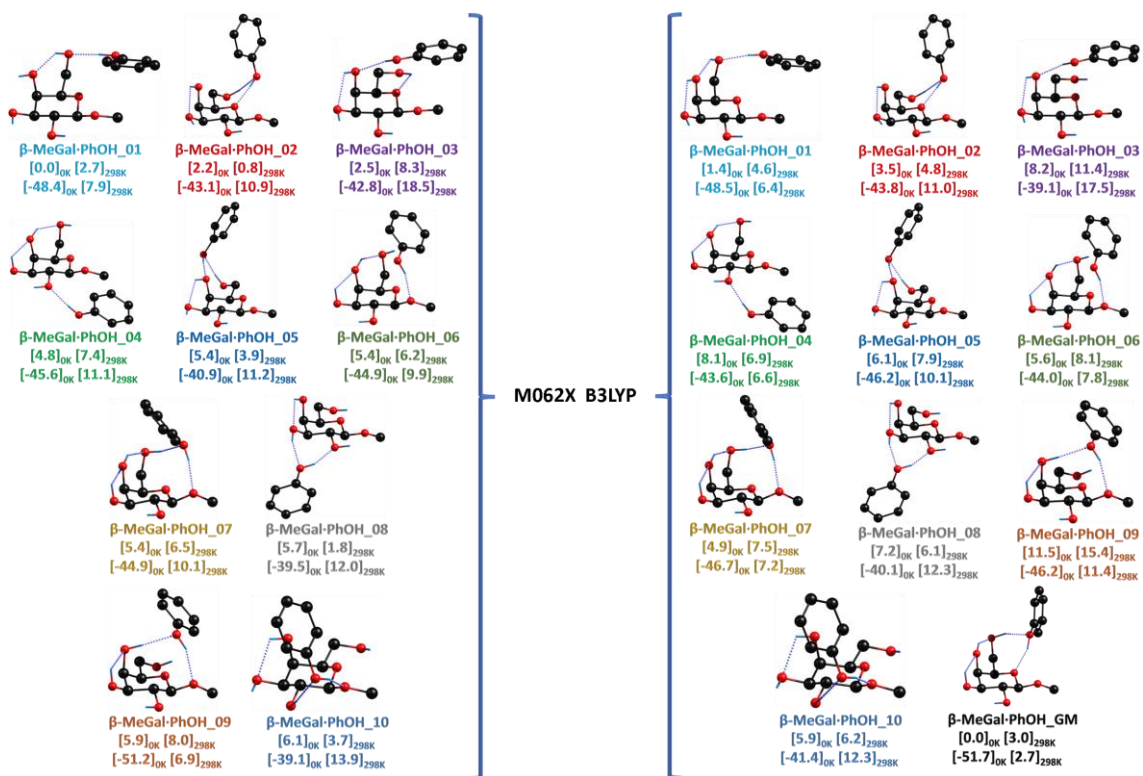

**Figure S20.** Comparison between the experimental IDIR spectrum for  $\beta$ -MeGal-PhOH complex and the computational simulations for the ten most stable structures at B3LYP(D3)/6-311++G(d,p) and M062X/6-311++G(d,p) level.

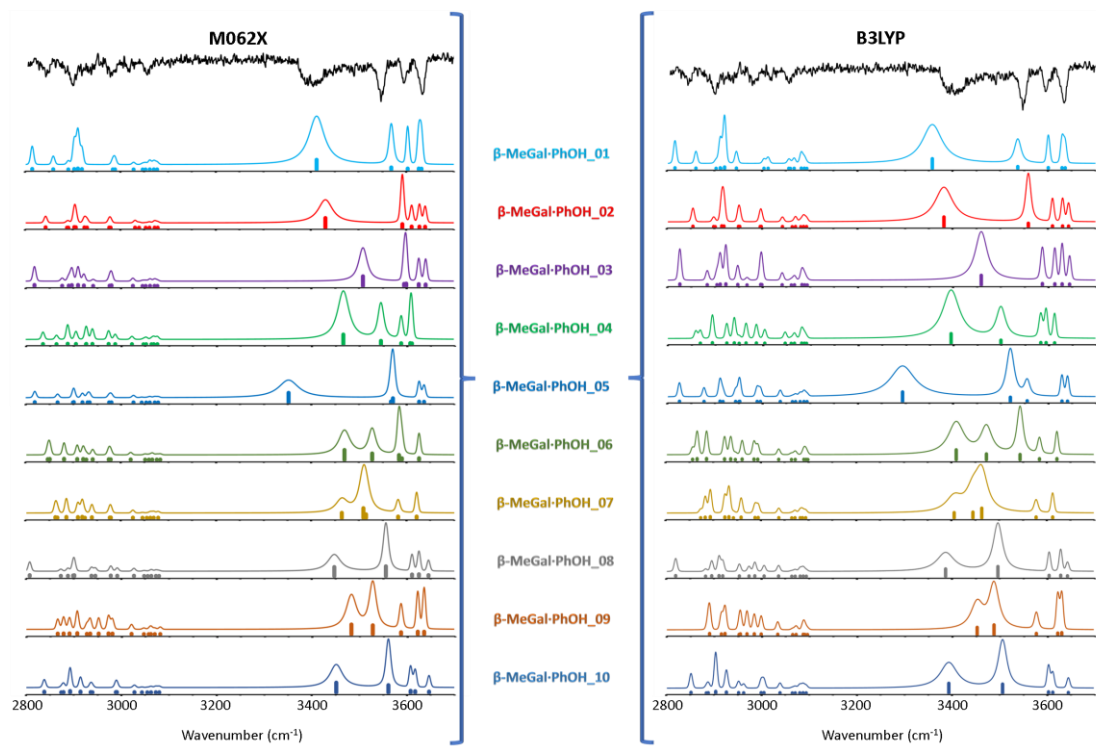



**Table S5.** Relative Gibbs energies for the most stable conformers of each family of  $\alpha$ -MeGlc·PhOH complex. Values include ZPE and BSSE corrections.

| LABEL                   | FAMILY            | M062X                       |                               | B3LYP                       |                               | RMSD<br>(NO H ATOMS) |
|-------------------------|-------------------|-----------------------------|-------------------------------|-----------------------------|-------------------------------|----------------------|
|                         |                   | $\Delta G$ (0K)<br>(kJ/mol) | $\Delta G$ (298K)<br>(kJ/mol) | $\Delta G$ (0K)<br>(kJ/mol) | $\Delta G$ (298K)<br>(kJ/mol) |                      |
| $\alpha$ -MeGlc·PhOH_01 | HO6·HOPh          | 0.0                         | 5.7                           | 0.0                         | 0.4                           | 0.12                 |
| $\alpha$ -MeGlc·PhOH_02 | HO3·HOPh_O4H·OHPH | 3.8                         | 5.5                           | 4.0                         | 0.8                           | 0.21                 |
| $\alpha$ -MeGlc·PhOH_03 | O4H·OHPH_HO6·HOPh | 3.8                         | 7.6                           | 6.4                         | 4.3                           | 0.17                 |
| $\alpha$ -MeGlc·PhOH_04 | HO4·HOPh          | 5.3                         | 9.3                           | 6.0                         | 2.7                           | 0.12                 |
| $\alpha$ -MeGlc·PhOH_05 | HO2·HOPh          | 6.6                         | 11.1                          | 10.4                        | 7.6                           | 0.08                 |
| $\alpha$ -MeGlc·PhOH_06 | HO2·HOPh_O3H·OHPH | 0.0                         | 5.7                           | 0.0                         | 0.4                           | 0.12                 |
| $\alpha$ -MeGlc·PhOH_07 | HO3·HOPh          | 3.8                         | 5.5                           | 4.0                         | 0.8                           | 0.21                 |
| $\alpha$ -MeGlc·PhOH_08 | O5·HOPh_O6H·OHPH  | 3.8                         | 7.6                           | 6.4                         | 4.3                           | 0.17                 |
| $\alpha$ -MeGlc·PhOH_09 | O1·HOPh_O2H·OHPH  | 5.3                         | 9.3                           | 6.0                         | 2.7                           | 0.12                 |
| $\alpha$ -MeGlc·PhOH_10 | HO4·HOPh_O6H·OHPH | 6.6                         | 11.1                          | 10.4                        | 7.6                           | 0.08                 |

**Figure S21.** Most stable conformers of  $\alpha$ -MeGlc-PhOH complex computed at B3LYP(D3)/6-311++G(d,p) and M062X/6-311++G(d,p) level. Energies inside brackets are given in kJ/mol.

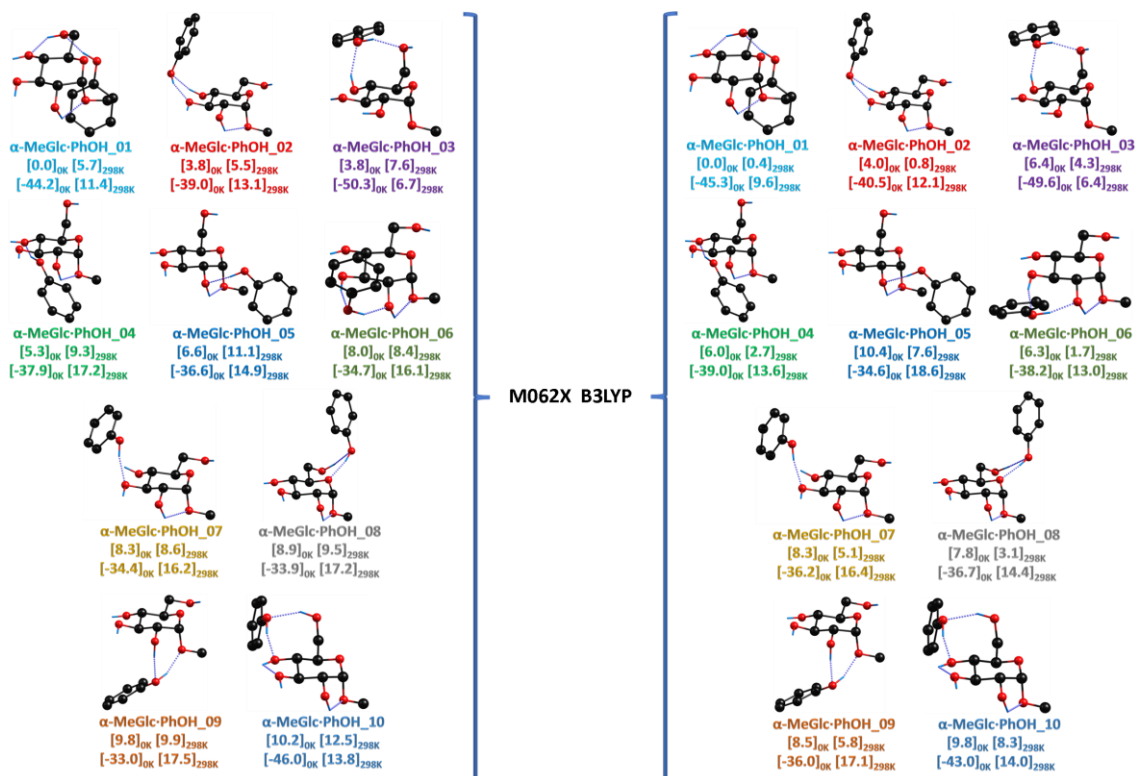

**Figure S22.** Comparison between the experimental IDIR spectrum for  $\alpha$ -MeGlc-PhOH complex and the computational simulations for the ten most stable structures at B3LYP(D3)/6-311++G(d,p) and M062X/6-311++G(d,p) level.

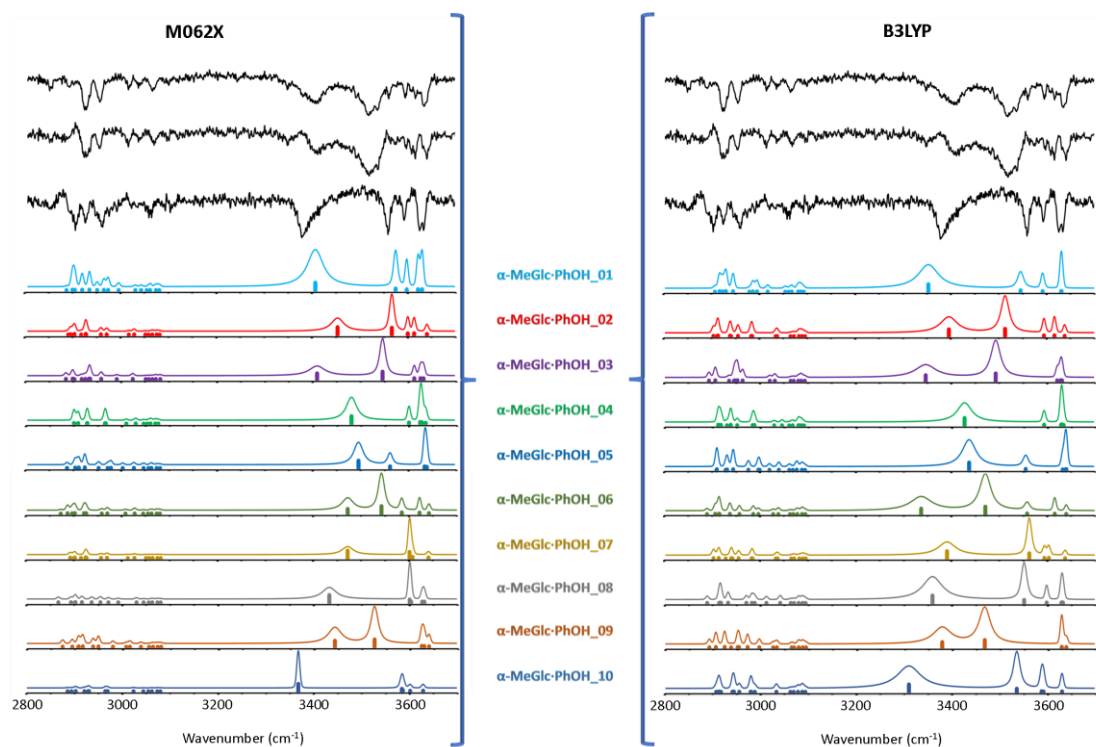

**Table S6.** Relative Gibbs energies for the most stable conformers of each family of  $\alpha$ -MeGal·PhOH complex. Values include ZPE and BSSE corrections.

| LABEL                   | FAMILY            | M062X                       |                               | B3LYP                       |                               | RMSD<br>(NO H ATOMS) |
|-------------------------|-------------------|-----------------------------|-------------------------------|-----------------------------|-------------------------------|----------------------|
|                         |                   | $\Delta G$ (0K)<br>(kJ/mol) | $\Delta G$ (298K)<br>(kJ/mol) | $\Delta G$ (0K)<br>(kJ/mol) | $\Delta G$ (298K)<br>(kJ/mol) |                      |
| $\alpha$ -MeGal·PhOH_01 | HO6·HOPh          | 0.0                         | 0.0                           | 0.0                         | 0.0                           | 0.11                 |
| $\alpha$ -MeGal·PhOH_02 | HO2·HOPh          | 5.3                         | 4.8                           | 7.0                         | 3.0                           | 0.14                 |
| $\alpha$ -MeGal·PhOH_03 | O5·HOPh_O6H·OHPH  | 7.6                         | 6.2                           | 5.6                         | 3.6                           | 0.09                 |
| $\alpha$ -MeGal·PhOH_04 | HO4·HOPh_O6H·OHPH | 8.6                         | 5.4                           | 6.2                         | 4.3                           | 0.10                 |
| $\alpha$ -MeGal·PhOH_05 | HO3·HOPh_O4H·OHPH | 9.4                         | 5.1                           | 7.8                         | 4.4                           | 0.15                 |
| $\alpha$ -MeGal·PhOH_06 | HO4·HOPh          | 9.7                         | 8.4                           | 9.0                         | 6.2                           | 0.12                 |
| $\alpha$ -MeGal·PhOH_07 | HO2·HOPh_O3H·OHPH | 11.0                        | 6.4                           | 7.9                         | 1.6                           | 0.39                 |
| $\alpha$ -MeGal·PhOH_08 | HO3·HOPh          | 12.4                        | 8.8                           | 11.9                        | 7.0                           | 0.11                 |
| $\alpha$ -MeGal·PhOH_09 | O2H·OHPH_HO3·HOPh | 12.4                        | 9.0                           | 12.5                        | 9.3                           | 0.14                 |
| $\alpha$ -MeGal·PhOH_10 | O5·HOPh           | 12.7                        | 3.3                           | 9.9                         | 4.5                           | 0.14                 |

**Figure S23.** Most stable conformers of  $\alpha$ -MeGal-PhOH complex computed at B3LYP(D3)/6-311++G(d,p) and M062X/6-311++G(d,p) level. Energies inside brackets are given in kJ/mol.

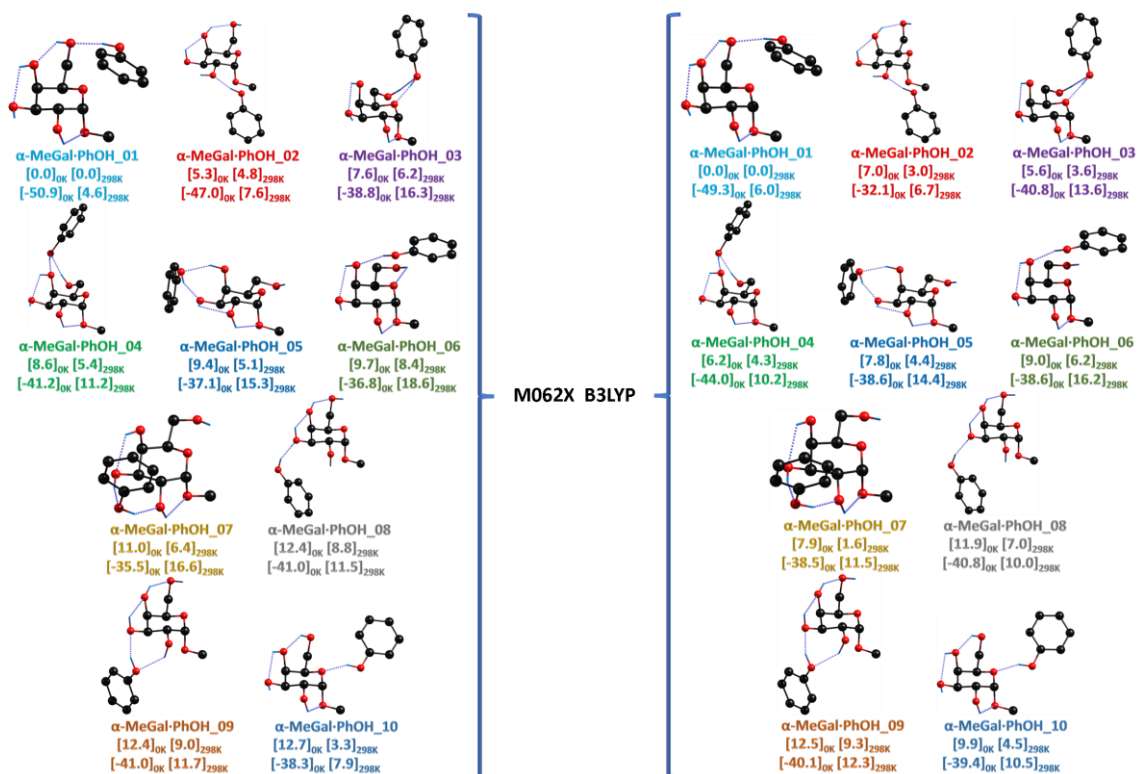

M062X B3LYP

**Figure S24.** Comparison between the experimental IDIR spectrum for  $\alpha$ -MeGal-PhOH complex and the computational simulations for the ten most stable structures at B3LYP(D3)/6-311++G(d,p) and M062X/6-311++G(d,p) level.

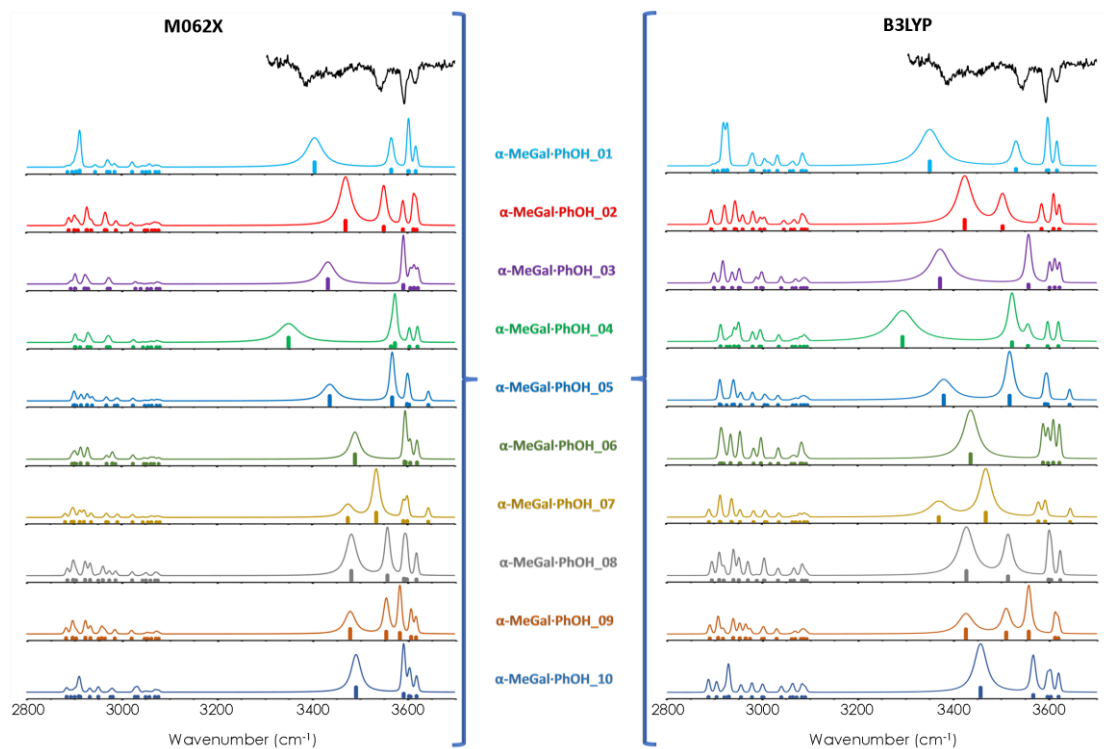

Supplement: d2cp06036a1.pdf [file d2cp06036a1.pdf]
